# Supplementary material for: Controlling the self-assembly of human calcitonin: a theoretical approach using molecular dynamics simulations
Source: Royal Society of Chemistry journal article supplement (doi:10.1039/d1cp00825k), 2021-01-01
Supplement: d1cp00825k1.pdf [file d1cp00825k1.pdf]

## Supplementary Material

Controlling the Self-assembly of Human Calcitonin: A  
Theoretical Approach from Molecular Dynamics Simulation

Srijita Paul and Sandip Paul\*

*Department of Chemistry, Indian Institute of Technology, Guwahati Assam, India-781039*  
*(Dated: May 6, 2021)*

| Systems           | $N_{\text{hCT}}$ | $N_{\text{inh}}$ | $N_{\text{w}}$ | Box length (Å) | $M_{\text{p}}$ (mM) |
|-------------------|------------------|------------------|----------------|----------------|---------------------|
| T1 (hCT+sCT)      | 5                | 5                | 10000          | 70.29          | 23.9                |
| T2 (hCT+phCT)     | 5                | 5                | 10000          | 70.24          | 23.9                |
| T3 (hCT+DM hCT)   | 5                | 5                | 10000          | 70.19          | 24.0                |
| T4 (hCT+N17H hCT) | 5                | 5                | 10000          | 70.27          | 23.9                |
| T5 (hCT+Y12L hCT) | 5                | 5                | 10000          | 70.21          | 24.0                |

**TABLE S1:**  $N_{\text{hCT}}$ ,  $N_{\text{inh}}$ , and  $N_{\text{w}}$  represent the number of hCT, inhibitor peptides and water molecules respectively.  $M_{\text{p}}$  represents the peptide concentration in millimolar.

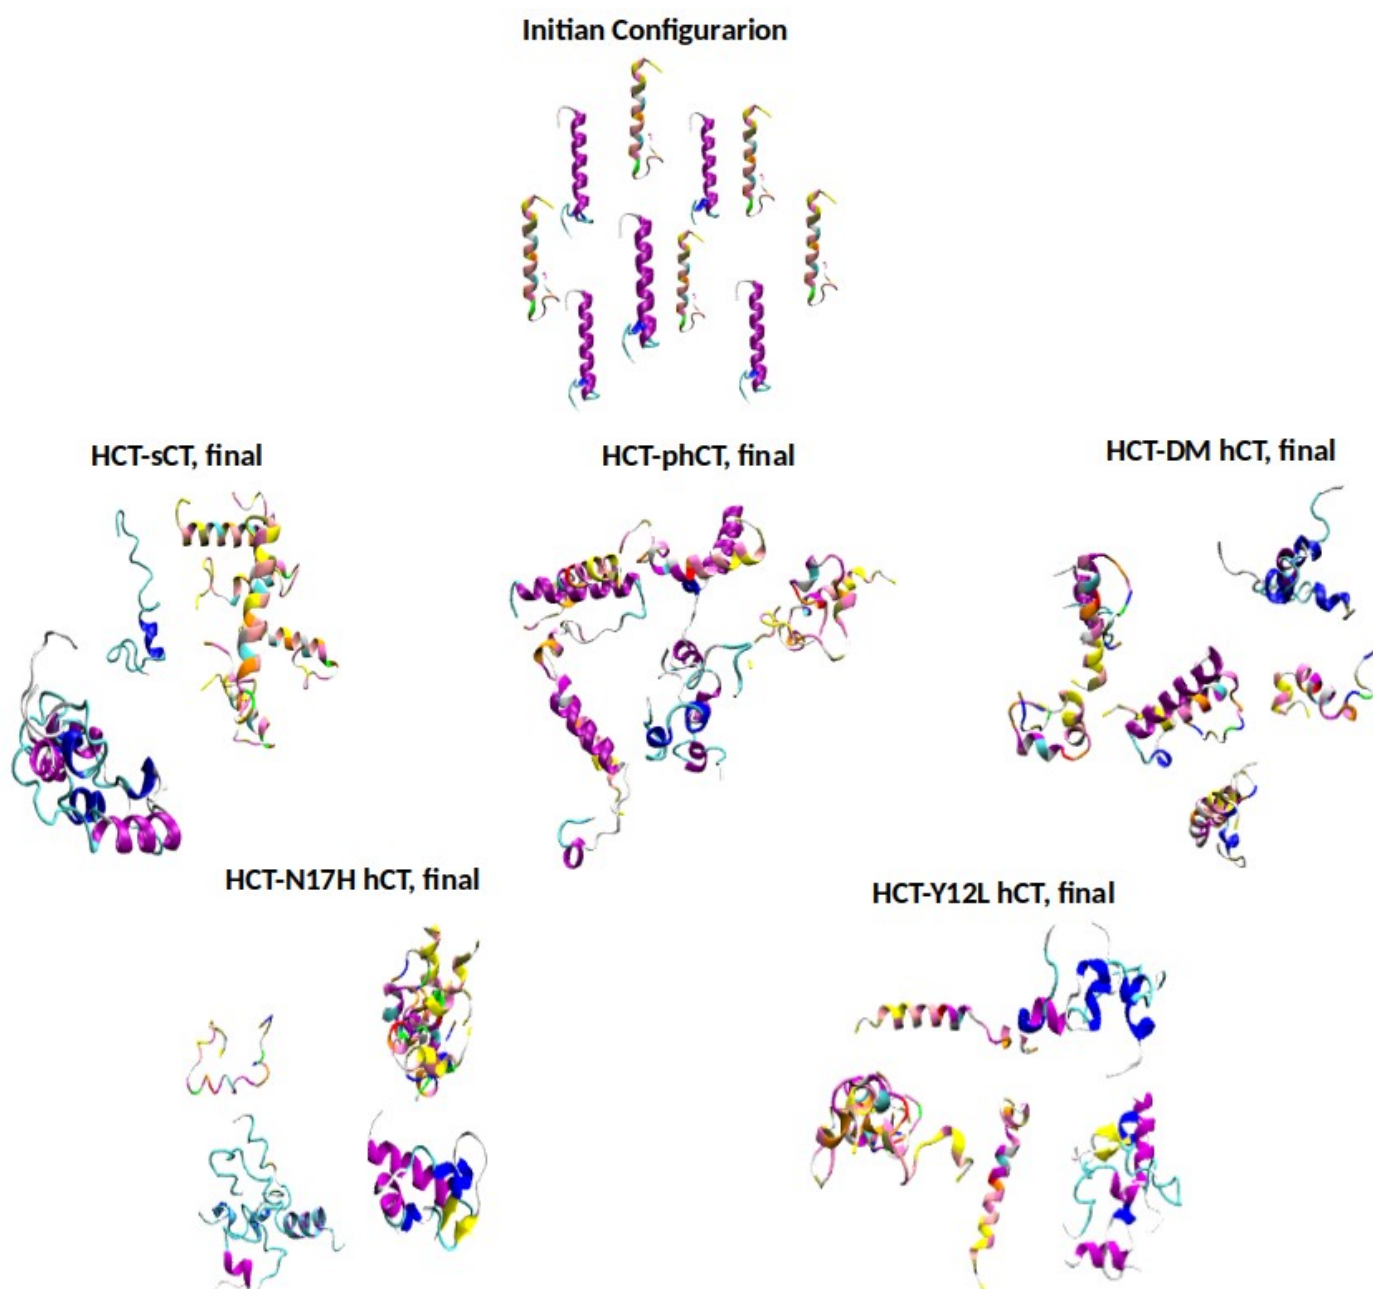

**FIG. S1:** Snapshot of hCT peptides (pink) and inhibitor peptides (colored according to rename) at starting and end of the simulation for different systems. As all the initial structures are visually similar, only one snapshot is provided. Water molecules are left off due to visual clarity.

| <b>Systems</b>        | <b>Helix</b>        | <b><math>\beta</math>-sheet</b> | <b>Coil</b>         | <b>Turn</b>         |
|-----------------------|---------------------|---------------------------------|---------------------|---------------------|
| S0 (hCT+no inhibitor) | 36.88 ( $\pm$ 0.76) | 2.66 ( $\pm$ 0.09)              | 43.66 ( $\pm$ 0.97) | 16.80 ( $\pm$ 0.36) |
| T1 (hCT+sCT)          | 39.21 ( $\pm$ 0.56) | 1.23 ( $\pm$ 0.03)              | 43.44 ( $\pm$ 1.11) | 16.12 ( $\pm$ 0.21) |
| T2 (hCT+phCT)         | 49.56 ( $\pm$ 0.67) | 0                               | 38.02 ( $\pm$ 0.93) | 12.42 ( $\pm$ 0.27) |
| T3 (hCT+DM hCT)       | 48.91 ( $\pm$ 0.61) | 0                               | 38.11 ( $\pm$ 0.81) | 12.98 ( $\pm$ 0.29) |
| T4 (hCT+N17H hCT)     | 38.73 ( $\pm$ 0.68) | 3.78 ( $\pm$ 0.09)              | 42.78 ( $\pm$ 0.78) | 14.71 ( $\pm$ 0.24) |
| T5 (hCT+Y12L hCT)     | 39.19 ( $\pm$ 0.60) | 3.43 ( $\pm$ 0.07)              | 41.02 ( $\pm$ 0.84) | 16.36 ( $\pm$ 0.30) |

**TABLE S2:** Percentage of Helix,  $\beta$ -Sheet, coil and turn conformations of hCT for the systems T1 to T5. Standard deviations are calculated using block average method and included in the parenthesis.
